# Supplementary material for: Suplementos para el cultivo: Fitohormonas y aminoácidos
Source: Hindawi journal article supplement (doi:10.1155/2021/9201235), 2010-01-01
Supplement: f1 [file 9201235.f1.doc]

**Supplementary figures**

**
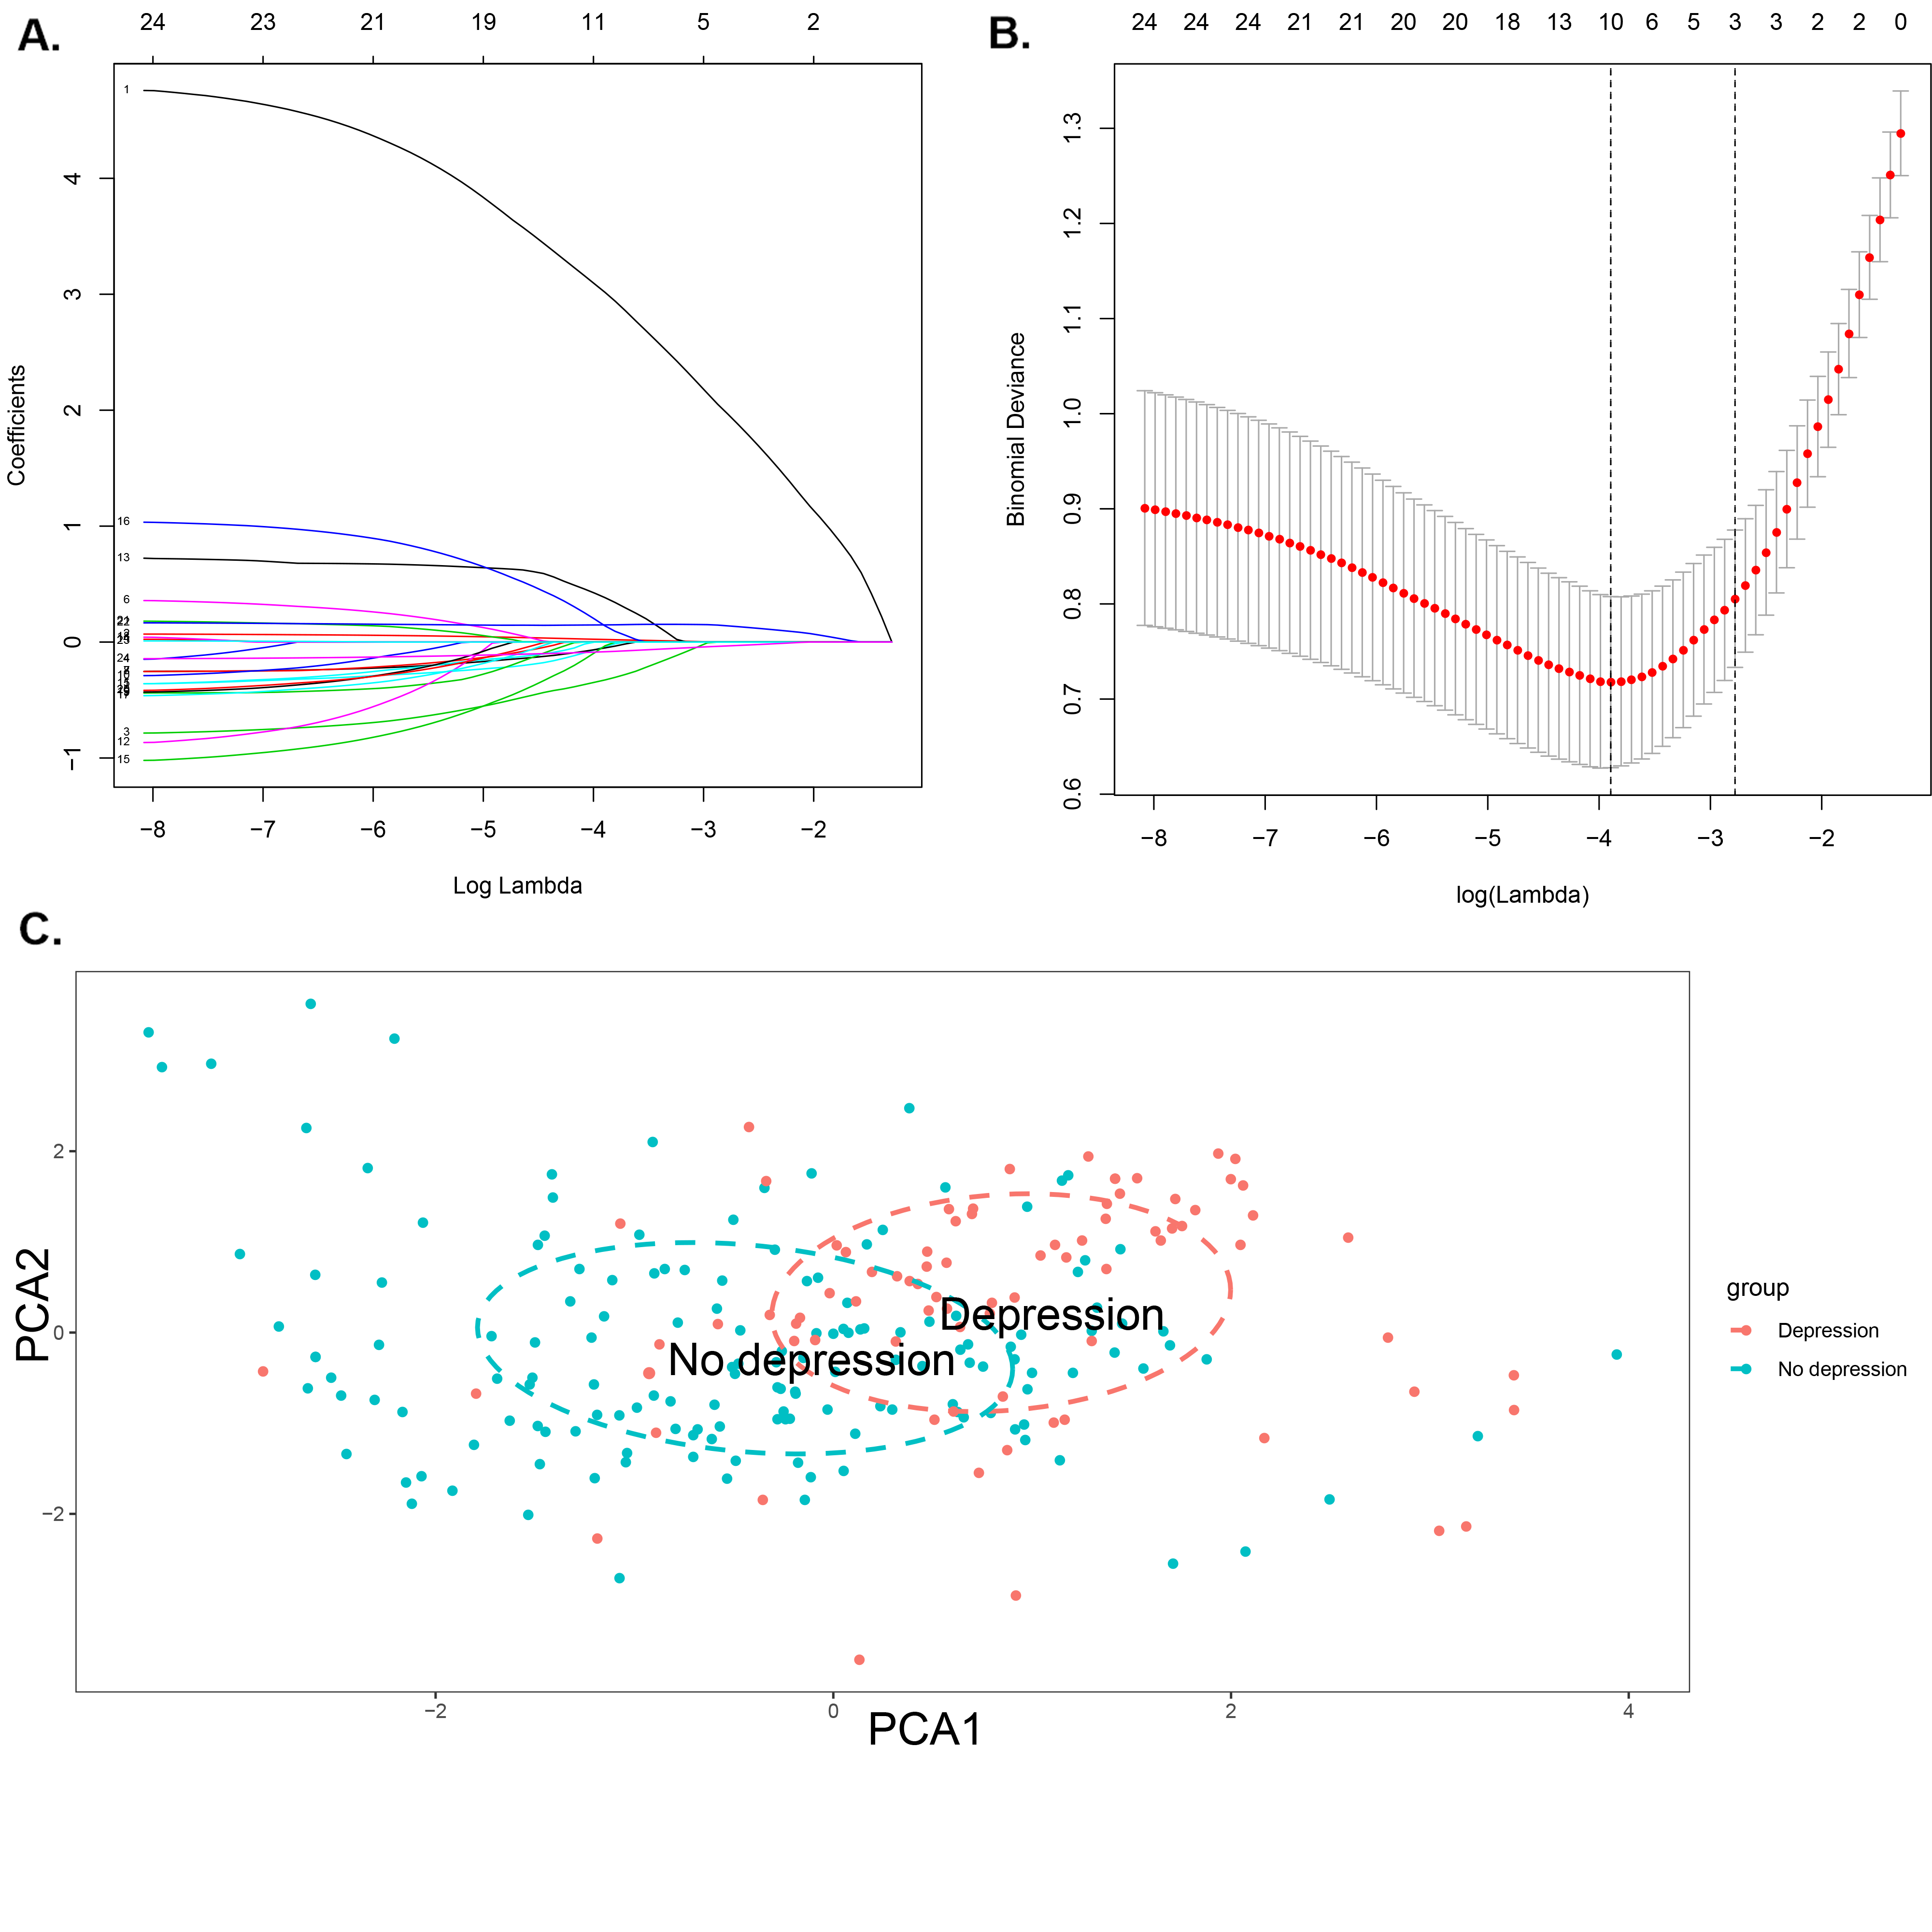
**

**Supplementary figure 1. Screening predictors**

A. In the Lasso model, a five-time cross-validation method is used to select the optimal parameters. The partial likelihood anomaly curves and log (lambda) curves are used to draw a vertical line at the optimal value.

B. The curve is sorted according to log (lambda) to generate a profile. A vertical line is drawn at the value selected by the five-time cross-validation method, and finally, 5 characteristic factors are selected.

C. Principal component analysis (PCA) reveals that the predictors can distinguish between the depressed and non-depressed group. The blue dots represent dead samples, while the red dots indicate the survival samples.


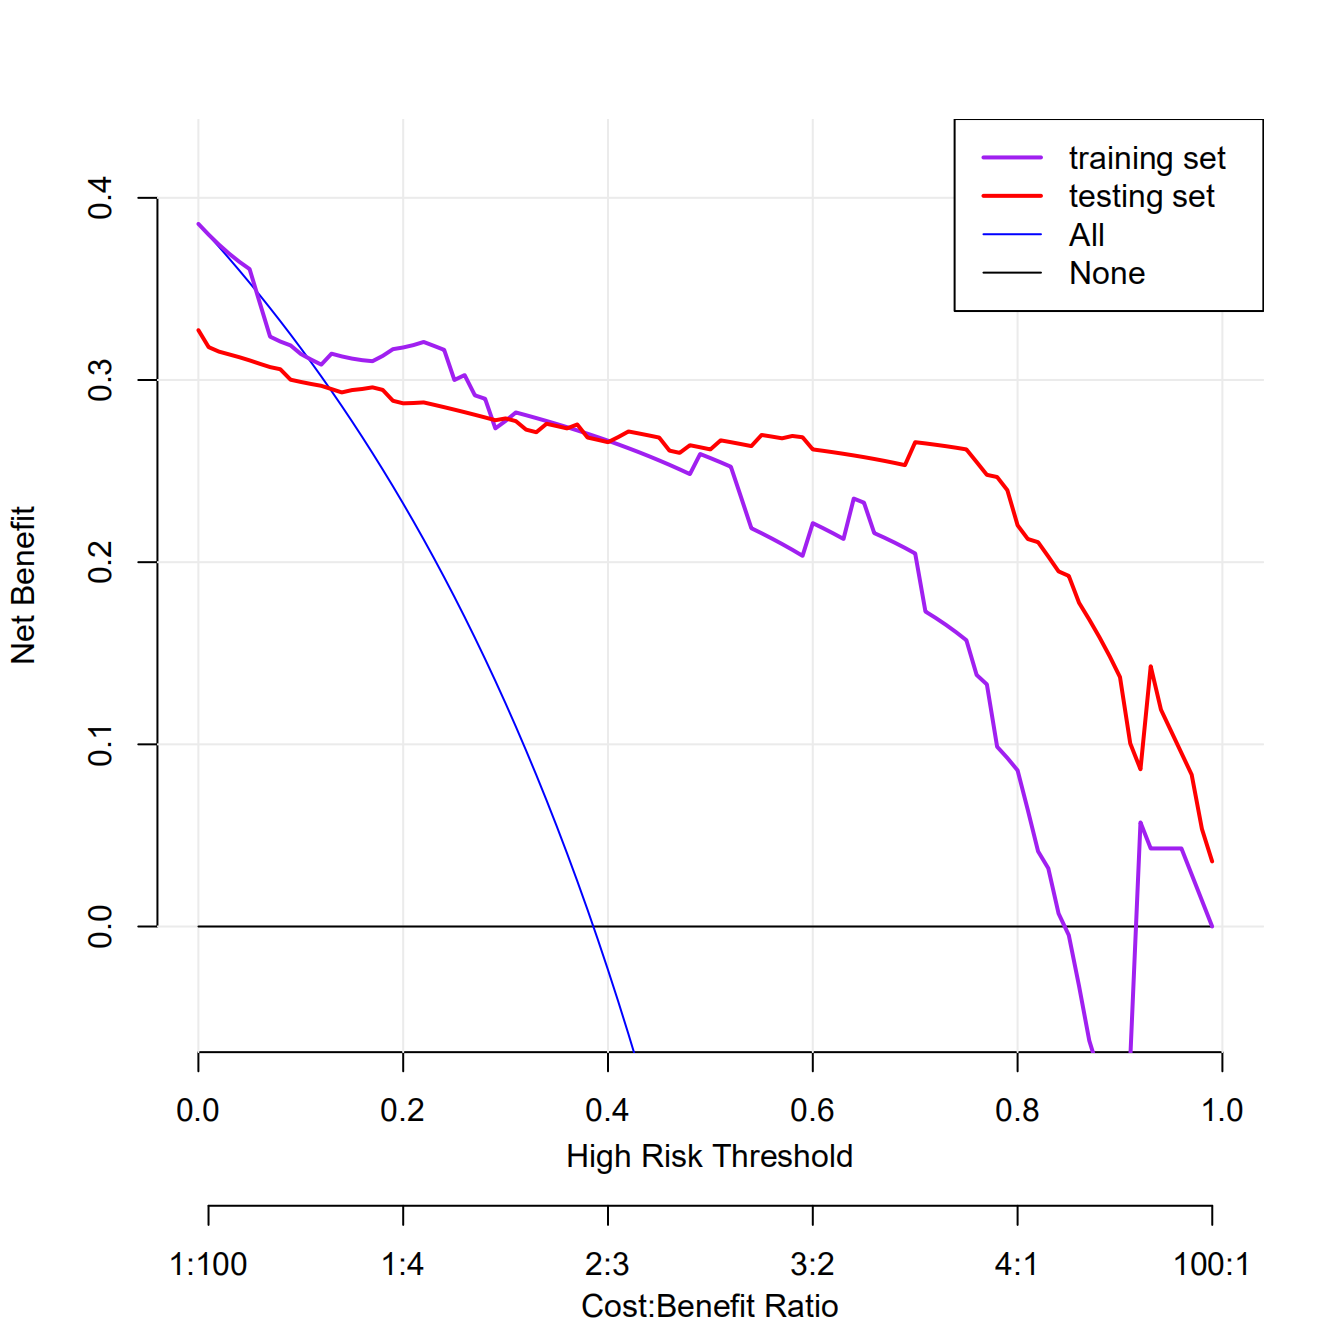


**Supplementary figure 2. Evaluation of the clinical application ability of the model**

# The decision curve of depressive symptomatology in patients with NHL. The decision analysis curve of the training group and the test group.

**Supplementary tables**

| Supplementary table 1: Rank the order of features in SVM-RFE method | | |
| --- | --- | --- |
| Features | Coefficients | Rank the order |
| Sex | -4.75266432 | 1 |
| Total QLQ-C30 score | -2.21413383 | 2 |
| Age | -2.3517654 | 3 |
| Education level | 3.03876115 | 4 |
| PSQI | -0.06223234 | 5 |
| SSRS | -0.35657536 | 6 |
